# Supplementary material
Source: MDPI journal article supplement (https://www.mdpi.com/2073-4433/10/3/136)
Supplement: s1 [file s1]

# New interpretative scales for lichen bioaccumulation data: the Italian proposal

Elva Cecconi <sup>1§</sup>, Lorenzo Fortuna <sup>1§</sup>, Renato Benesperi <sup>2</sup>, Elisabetta Bianchi <sup>2</sup>, Giorgio Brunialti <sup>3</sup>, Tania Contardo <sup>4</sup>, Luca Di Nuzzo <sup>2</sup>, Luisa Frati <sup>3</sup>, Fabrizio Monaci <sup>4</sup>, Silvana Munzi <sup>5</sup>, Juri Nascimbene <sup>6</sup>, Luca Paoli <sup>7</sup>, Sonia Ravera <sup>8</sup>, Andrea Vannini <sup>4</sup>, Paolo Giordani <sup>9\*</sup>, Stefano Loppi <sup>4\*</sup>, Mauro Tretiach <sup>1\*</sup>

<sup>1</sup> Department of Life Sciences, University of Trieste, Via L. Giorgieri 10, 34127 Trieste, Italy; elva.cecconi@phd.units.it; lfortuna@units.it; tretiach@units.it

<sup>2</sup> Department of Biology, University of Firenze, Via La Pira 4, 50121 Firenze, Italy; renato.benesperi@unifi.it; e.bianchi@unifi.it; luca.dinuzzo@stud.unifi.it

<sup>3</sup> TerraData environmetrics, Spin Off of the University of Siena, Via L. Bardelloni 19, 58025 Monterotondo Marittimo (GR), Italy; brunialti@terradata.it; frati@terradata.it

<sup>4</sup> Department of Life Sciences, University of Siena, via Mattioli 4, 53100 Siena, Italy; tania.contardo2@unisi.it; fabrizio.monaci@unisi.it; andrea.vannini@unisi.it; stefano.loppi@unisi.it

<sup>5</sup> Centre for Ecology, Evolution and Environmental Changes (cE3c), Faculdade de Ciências, Universidade de Lisboa, Campo Grande, 1749-016 Lisbon, Portugal; ssmunzi@fc.ul.pt

<sup>6</sup> Department of Biological, Geological and Environmental Sciences, University of Bologna, Via Irnerio 42, 40126 Bologna, Italy; juri.nascimbene@unibo.it

<sup>7</sup> Department of Biology, University of Pisa, via L. Ghini, 13, 56126 Pisa, Italy; luca.paoli@unipi.it

<sup>8</sup> Department of Biosciences and Territory (DiBT), University of Molise, C.da Fonte Lappone, 86090 Pesche (Isernia), Italy; sonia.ravera@unimol.it

<sup>9</sup> DIFAR, University of Genova, Viale Cembrano 4, 16148 Genova, Italy; giordani@difar.unige.it

§ These authors contributed equally to this work

\* Correspondence: giordani@difar.unige.it +39-010-3532645 (P.G.); stefano.loppi@unisi.it +39-0577-233740 (S.L.); tretiach@units.it, +39-040-5583885 (M.T.)

## Supplementary material

### METHODS S1

### TABLES S1-S6

### FIGURES S1-S3

## METHODS S1

In order to assess whether *B* and *EU* ratios were substantially unaffected by inter-specific differences, their median values were tested for significant differences using Mann-Whitney's U test for independent samples. Median *B* ratios were tested using the column vector reported in Data S1.

Median *EU* ratios were tested before outlier removal (overall *EU* ratio data), and separately in each *EU* ratio sub-dataset after outlier removal (exposure time spans of 4, 8 and 12 weeks; Data S2-S4). Statistical significance was tested in all cases at  $\alpha = 0.05$  (Table S1).

## SUPPLEMENTARY TABLES

**Table S1.** Results of statistical testing (Mann-Whitney U test for independent samples) for differences between median values of *B* ratios (native lichens) in *Flavoparmelia caperata* and *Xanthoria parietina*, as well as between median values of *EU* ratios (lichen transplants) in *Evernia prunastri* (*Ep*) and *Pseudevernia furfuracea* (*Pf*) (either reported for the overall data or separately for each exposure time span). Data counts (n) are reported in brackets in the headers.

| <i>B ratio</i>                                                          |       |                |  |
|-------------------------------------------------------------------------|-------|----------------|--|
| <i>(Flavoparmelia caperata, n = 3005; Xanthoria parietina, n = 768)</i> |       |                |  |
| U                                                                       | Z     | <i>p-value</i> |  |
| 1'120'389                                                               | 1.245 | 0.213          |  |

| <i>EU ratio</i>                                                       |        |        |                |
|-----------------------------------------------------------------------|--------|--------|----------------|
| <i>(Evernia prunastri, n = 150; Pseudevernia furfuracea, n = 670)</i> |        |        |                |
| Exposure time span                                                    | U      | Z      | <i>p-value</i> |
| Overall                                                               | 49'992 | 0.098  | 0.922          |
| 4 weeks ( <i>Ep</i> , n = 77; <i>Pf</i> , n = 92)                     | 3406   | -0.428 | 0.669          |
| 8 weeks ( <i>Ep</i> , n = 24; <i>Pf</i> , n = 306)                    | 3164   | 1.128  | 0.259          |
| 12 weeks ( <i>Ep</i> , n = 48; <i>Pf</i> , n = 240)                   | 5406   | 0.671  | 0.502          |

**Table S2.** Lichen Background Element Concentration values (BECs,  $\mu\text{g g}^{-1}$  DW) reported by Bargagli [2], Bennett [9] and Cecconi et al. [13], with indication of target lichen species, reference areas and number of sampling sites (in brackets, when available). Data reported by Bargagli refer to element concentration ranges [2].

| Element | Bargagli <sup>1</sup> | Bennett <sup>1</sup>       |      | Cecconi et al. <sup>2</sup>    |                   |                   |                |
|---------|-----------------------|----------------------------|------|--------------------------------|-------------------|-------------------|----------------|
|         | Foliose species       | <i>Hypogymnia physodes</i> |      | <i>Pseudevernia furfuracea</i> |                   |                   |                |
|         | Multiple areas        | Multiple areas             |      | Eastern Alps (12)              | Central Alps (13) | Western Alps (11) | Apennines (18) |
| Al      | 150 ÷ 300             | 448                        | (32) | 688                            | 1024              | 835               | 1600           |
| As      | 0.7 ÷ 2.0             | 1.33                       | (7)  | 0.611                          | 0.605             | 0.398             | 0.407          |
| Cd      | < 0.1 ÷ 0.3           | 0.562                      | (37) | 0.159                          | 0.204             | 0.155             | 0.251          |
| Cr      | 1 ÷ 4                 | 2.11                       | (33) | 5.26                           | 5.93              | 7.02              | 8.33           |
| Cu      | 4 ÷ 10                | 5.96                       | (37) | 4.5                            | 7.36              | 4.79              | 4.95           |
| Hg      | < 0.1 ÷ 0.2           | 0.253                      | (15) | -                              | -                 | -                 | -              |
| Ni      | 1 ÷ 3                 | 1.72                       | (33) | 1.17                           | 1.83              | 4.46              | 1.77           |
| Pb      | 1 ÷ 8                 | 19.5                       | (39) | 2.77                           | 4.49              | 2.35              | 4.6            |
| Ti      | 5 ÷ 35                | 26.4                       | (5)  | 43.4                           | 60.2              | 55                | 106            |
| V       | < 1 ÷ 3               | 16.9                       | (8)  | 1.2                            | 1.88              | 1.41              | 2.8            |
| Zn      | 20 ÷ 90               | 73                         | (43) | 38                             | 64.4              | 40                | 31.4           |

<sup>1</sup> Review-based BECs.

<sup>2</sup> Field-assessed BECs.

**Table S3.** Percentile-based, 7-class, naturality/alteration scale for bioaccumulation data provided by Nimis and Bargagli [14] (the abbreviations in brackets are the same used in Table S5). Data refer to percentile thresholds, corresponding element concentration values ( $\mu\text{g g}^{-1}$  DW) for the 11 elements included in the *N* dataset after the methodological data filtering (Sect. 2.2 and 3.1), and the colours suggested by the authors [14] (data counts are reported in brackets below each element).

|   | <b>Class (abbreviation)</b> |          | <b>Percentile</b>                   | <b>Al</b><br>(626) | <b>As</b><br>(435) | <b>Cd</b><br>(626) | <b>Cr</b><br>(654) | <b>Cu</b><br>(656) | <b>Hg</b><br>(606) | <b>Ni</b><br>(655) | <b>Pb</b><br>(699) | <b>Ti</b><br>(138) | <b>V</b><br>(416) | <b>Zn</b><br>(699) | <b>Color</b> |
|---|-----------------------------|----------|-------------------------------------|--------------------|--------------------|--------------------|--------------------|--------------------|--------------------|--------------------|--------------------|--------------------|-------------------|--------------------|--------------|
| 1 | Very high naturality        | (V.h.n)  | < 20 <sup>th</sup>                  | < 350              | < 0.2              | < 0.2              | < 1.2              | < 7                | < 0.07             | < 1                | < 4                | < 13               | < 0.63            | < 30               | Blue         |
| 2 | High naturality             | (H.n.)   | 20 <sup>th</sup> - 50 <sup>th</sup> | 350-600            | 0.2-0.6            | 0.2-0.4            | 1.2-2.2            | 7-10               | 0.07-0.13          | 1-2                | 4-10               | 13-27              | 0.63-1.7          | 30-40              | Dark green   |
| 3 | Middle naturality           | (M.n.)   | 50 <sup>th</sup> - 75 <sup>th</sup> | 600-1000           | 0.6-1.2            | 0.4-0.8            | 2.2-4.0            | 10-15              | 0.13-0.20          | 2-3                | 10-25              | 27-70              | 1.7-3.1           | 40-65              | Pale green   |
| 4 | Low nat./alteration         | (L.a.)   | 75 <sup>th</sup> - 90 <sup>th</sup> | 1000-1600          | 1.2-1.9            | 0.8-1.4            | 4.0-6.0            | 15-25              | 0.20-0.29          | 3-5                | 25-55              | 70-97              | 3.1-5.1           | 65-94              | Yellow       |
| 5 | Middle alteration           | (M.a.)   | 90 <sup>th</sup> - 95 <sup>th</sup> | 1600-2500          | 1.9-2.4            | 1.4-2.0            | 6.0-9.0            | 25-34              | 0.29-0.42          | 5-6                | 55-80              | 97-113             | 5.1-6.7           | 94-115             | Orange       |
| 6 | High alteration             | (H.a.)   | 95 <sup>th</sup> - 98 <sup>th</sup> | 2500-3200          | 2.4-3.0            | 2.0-2.6            | 9.0-16.0           | 34-53              | 0.42-0.74          | 6-8                | 80-108             | 113-150            | 6.7-9.3           | 115-155            | Red          |
| 7 | Very high alteration        | (V.h.a.) | > 98 <sup>th</sup>                  | > 3200             | > 3.0              | > 2.6              | >16.0              | > 53               | 0.74               | > 8                | > 108              | > 150              | > 9.3             | > 155              | Crimson      |

**Table S4.** Accumulation/loss scale provided by Frati et al. [25] with 5 *EC* ratio classes (the abbreviations in brackets are the same used in Table S6).

| <b>Accumulation/loss (abbreviation)</b> |        | <b><i>EC</i> ratio</b> |
|-----------------------------------------|--------|------------------------|
| Severe loss                             | (S.l.) | 0 – 0.25               |
| Loss                                    | (Loss) | 0.25 – 0.75            |
| Normal                                  | (N.)   | 0.75 – 1.25            |
| Accumulation                            | (Acc.) | 1.25 – 1.75            |
| Severe accumulation                     | (S.a.) | > 1.75                 |

**Table S5.** Results of the comparative application of the naturality/alteration scales by Nimis and Bargagli [14] (nat./alt. class) and the bioaccumulation scale in Table 4 (B. class) to a real case study. Data refer to three elements (As, Cd, Cr) measured in samples of *Flavoparmelia caperata* and *Xanthoria parietina* collected in 40 sampling sites (Figure 3). Abbreviations for classes of naturality/alteration and bioaccumulation scales are reported in Table S3 and Table 4. The attribution of classes is based on absolute element concentration expressed in  $\mu\text{g g}^{-1}$  DW (Elem. conc.) for naturality/alteration scales, whereas it is based on the *B* ratio for the bioaccumulation scale.

| Site | <i>Flavoparmelia caperata</i> |                 |         |          |             |                 |         |          |             |                 |         |          | <i>Xanthoria parietina</i> |                 |         |          |             |                 |         |          |             |                 |         |          |
|------|-------------------------------|-----------------|---------|----------|-------------|-----------------|---------|----------|-------------|-----------------|---------|----------|----------------------------|-----------------|---------|----------|-------------|-----------------|---------|----------|-------------|-----------------|---------|----------|
|      | As                            |                 |         |          | Cd          |                 |         |          | Cr          |                 |         |          | As                         |                 |         |          | Cd          |                 |         |          | Cr          |                 |         |          |
|      | Elem. conc.                   | Nat./alt. class | B ratio | B. class | Elem. conc. | Nat./alt. class | B ratio | B. class | Elem. conc. | Nat./alt. class | B ratio | B. class | Elem. conc.                | Nat./alt. class | B ratio | B. class | Elem. conc. | Nat./alt. class | B ratio | B. class | Elem. conc. | Nat./alt. class | B ratio | B. class |
| A4   | 0.23                          | 2 (H.n.)        | 1.65    | 2 (L)    | 0.11        | 1 (V.h.n.)      | 0.81    | 1 (A)    | 0.84        | 1 (V.h.n.)      | 0.99    | 1 (A)    | 0.85                       | 3 (M.n.)        | 8.12    | 5 (S)    | 0.07        | 1 (V.h.n.)      | 1.24    | 2 (L)    | 1.40        | 2 (H.n.)        | 1.17    | 2 (L)    |
| A6   |                               |                 |         |          |             |                 |         |          |             |                 |         |          | 0.28                       | 2 (H.n.)        | 2.67    | 3 (M)    | 0.07        | 1 (V.h.n.)      | 1.31    | 2 (L)    | 1.10        | 1 (V.h.n.)      | 0.92    | 1 (A)    |
| A7   |                               |                 |         |          |             |                 |         |          |             |                 |         |          | 0.20                       | 2 (H.n.)        | 1.91    | 2 (L)    | 0.09        | 1 (V.h.n.)      | 1.72    | 2 (L)    | 0.86        | 1 (V.h.n.)      | 0.72    | 1 (A)    |
| A8   |                               |                 |         |          |             |                 |         |          |             |                 |         |          | 0.22                       | 2 (H.n.)        | 2.10    | 3 (M)    | 0.10        | 1 (V.h.n.)      | 1.92    | 2 (L)    | 1.41        | 2 (H.n.)        | 1.17    | 2 (L)    |
| B3   | 0.27                          | 2 (H.n.)        | 1.94    | 2 (L)    | 0.18        | 1 (V.h.n.)      | 1.33    | 2 (L)    | 1.61        | 2 (H.n.)        | 1.91    | 2 (L)    | 0.25                       | 2 (H.n.)        | 2.34    | 3 (M)    | 0.12        | 1 (V.h.n.)      | 2.21    | 3 (M)    | 1.75        | 2 (H.n.)        | 1.46    | 2 (L)    |
| B4   |                               |                 |         |          |             |                 |         |          |             |                 |         |          | 0.12                       | 1 (V.h.n.)      | 1.15    | 2 (L)    | 0.05        | 1 (V.h.n.)      | 0.87    | 1 (A)    | 1.10        | 1 (V.h.n.)      | 0.92    | 1 (A)    |
| B5   |                               |                 |         |          |             |                 |         |          |             |                 |         |          | 0.32                       | 2 (H.n.)        | 3.06    | 3 (M)    | 0.22        | 2 (H.n.)        | 4.06    | 4 (H)    | 1.30        | 2 (H.n.)        | 1.08    | 2 (L)    |
| B6   |                               |                 |         |          |             |                 |         |          |             |                 |         |          | 0.29                       | 2 (H.n.)        | 2.77    | 3 (M)    | 0.12        | 1 (V.h.n.)      | 2.22    | 3 (M)    | 0.92        | 1 (V.h.n.)      | 0.77    | 1 (A)    |
| C2   |                               |                 |         |          |             |                 |         |          |             |                 |         |          | 0.20                       | 2 (H.n.)        | 1.91    | 2 (L)    | 0.07        | 1 (V.h.n.)      | 1.22    | 2 (L)    | 2.30        | 3 (M.n.)        | 1.92    | 2 (L)    |
| C3   | 0.18                          | 1 (V.h.n.)      | 1.29    | 2 (L)    | 0.17        | 1 (V.h.n.)      | 1.23    | 2 (L)    | 0.67        | 1 (V.h.n.)      | 0.79    | 1 (A)    | 0.29                       | 2 (H.n.)        | 2.72    | 3 (M)    | 0.09        | 1 (V.h.n.)      | 1.62    | 2 (L)    | 1.45        | 2 (H.n.)        | 1.21    | 2 (L)    |
| C4   |                               |                 |         |          |             |                 |         |          |             |                 |         |          | 0.24                       | 2 (H.n.)        | 2.29    | 3 (M)    | 0.28        | 2 (H.n.)        | 5.17    | 5 (S)    | 1.60        | 2 (H.n.)        | 1.34    | 2 (L)    |
| C5   |                               |                 |         |          |             |                 |         |          |             |                 |         |          | 0.21                       | 2 (H.n.)        | 2.01    | 2 (L)    | 0.09        | 1 (V.h.n.)      | 1.64    | 2 (L)    | 0.97        | 1 (V.h.n.)      | 0.81    | 1 (A)    |
| C6   | 0.31                          | 2 (H.n.)        | 2.22    | 3 (M)    | 0.45        | 3 (M.n.)        | 3.32    | 3 (M)    | 2.20        | 3 (M.n.)        | 2.60    | 3 (M)    | 0.25                       | 2 (H.n.)        | 2.39    | 3 (M)    | 0.64        | 3 (M.n.)        | 11.82   | 5 (S)    | 2.00        | 2 (H.n.)        | 1.67    | 2 (L)    |
| C7   | 0.35                          | 2 (H.n.)        | 2.51    | 3 (M)    | 0.24        | 2 (H.n.)        | 1.77    | 2 (L)    | 1.50        | 2 (H.n.)        | 1.77    | 2 (L)    |                            |                 |         |          |             |                 |         |          |             |                 |         |          |
| C8   | 0.27                          | 2 (H.n.)        | 1.94    | 2 (L)    | 0.12        | 1 (V.h.n.)      | 0.89    | 1 (A)    | 1.10        | 1 (V.h.n.)      | 1.30    | 2 (L)    |                            |                 |         |          |             |                 |         |          |             |                 |         |          |
| D1   | 0.20                          | 2 (H.n.)        | 1.43    | 2 (L)    | 0.18        | 1 (V.h.n.)      | 1.33    | 2 (L)    | 0.92        | 1 (V.h.n.)      | 1.09    | 2 (L)    |                            |                 |         |          |             |                 |         |          |             |                 |         |          |
| D2   | 0.21                          | 2 (H.n.)        | 1.51    | 2 (L)    | 0.27        | 2 (H.n.)        | 1.96    | 2 (L)    | 0.77        | 1 (V.h.n.)      | 0.90    | 1 (A)    |                            |                 |         |          |             |                 |         |          |             |                 |         |          |
| D3   | 0.28                          | 2 (H.n.)        | 2.01    | 2 (L)    | 0.23        | 2 (H.n.)        | 1.66    | 2 (L)    | 1.38        | 2 (H.n.)        | 1.63    | 2 (L)    |                            |                 |         |          |             |                 |         |          |             |                 |         |          |
| D4   | 0.16                          | 1 (V.h.n.)      | 1.15    | 2 (L)    | 0.11        | 1 (V.h.n.)      | 0.81    | 1 (A)    | 1.10        | 1 (V.h.n.)      | 1.30    | 2 (L)    | 0.18                       | 1 (V.h.n.)      | 1.69    | 2 (L)    | 0.05        | 1 (V.h.n.)      | 1.00    | 1 (A)    | 1.27        | 2 (H.n.)        | 1.06    | 2 (L)    |
| D5   | 0.51                          | 2 (H.n.)        | 3.66    | 4 (H)    | 0.18        | 1 (V.h.n.)      | 1.33    | 2 (L)    | 2.10        | 2 (H.n.)        | 2.48    | 3 (M)    | 0.26                       | 2 (H.n.)        | 2.48    | 3 (M)    | 0.07        | 1 (V.h.n.)      | 1.29    | 2 (L)    | 0.69        | 1 (V.h.n.)      | 0.58    | 1 (A)    |
| D6   | 0.30                          | 2 (H.n.)        | 2.15    | 3 (M)    | 0.15        | 1 (V.h.n.)      | 1.11    | 2 (L)    | 3.45        | 3 (M.n.)        | 4.08    | 4 (H)    |                            |                 |         |          |             |                 |         |          |             |                 |         |          |
| D7   |                               |                 |         |          |             |                 |         |          |             |                 |         |          | 1.00                       | 3 (M.n.)        | 9.55    | 5 (S)    | 0.75        | 3 (M.n.)        | 13.85   | 5 (S)    | 5.10        | 4 (L.n.)        | 4.26    | 4 (H)    |
| E1   | 0.35                          | 2 (H.n.)        | 2.47    | 3 (M)    | 0.37        | 2 (H.n.)        | 2.69    | 3 (M)    | 1.45        | 2 (H.n.)        | 1.71    | 2 (L)    |                            |                 |         |          |             |                 |         |          |             |                 |         |          |
| E2   | 0.20                          | 2 (H.n.)        | 1.40    | 2 (L)    | 0.20        | 2 (H.n.)        | 1.44    | 2 (L)    | 0.80        | 1 (V.h.n.)      | 0.94    | 1 (A)    |                            |                 |         |          |             |                 |         |          |             |                 |         |          |
| E3   | 0.23                          | 2 (H.n.)        | 1.65    | 2 (L)    | 0.24        | 2 (H.n.)        | 1.73    | 2 (L)    | 0.71        | 1 (V.h.n.)      | 0.84    | 1 (A)    |                            |                 |         |          |             |                 |         |          |             |                 |         |          |
| E4   | 0.24                          | 2 (H.n.)        | 1.72    | 2 (L)    | 0.24        | 2 (H.n.)        | 1.77    | 2 (L)    | 0.56        | 1 (V.h.n.)      | 0.66    | 1 (A)    |                            |                 |         |          |             |                 |         |          |             |                 |         |          |
| E5   | 0.33                          | 2 (H.n.)        | 2.37    | 3 (M)    | 0.20        | 2 (H.n.)        | 1.48    | 2 (L)    | 1.60        | 2 (H.n.)        | 1.89    | 2 (L)    |                            |                 |         |          |             |                 |         |          |             |                 |         |          |
| E6   | 0.61                          | 3 (M.n.)        | 4.34    | 4 (H)    | 0.19        | 1 (V.h.n.)      | 1.37    | 2 (L)    | 3.65        | 3 (M.n.)        | 4.31    | 4 (H)    |                            |                 |         |          |             |                 |         |          |             |                 |         |          |
| F1   | 0.21                          | 2 (H.n.)        | 1.51    | 2 (L)    | 0.20        | 2 (H.n.)        | 1.48    | 2 (L)    | 0.84        | 1 (V.h.n.)      | 0.99    | 1 (A)    |                            |                 |         |          |             |                 |         |          |             |                 |         |          |
| F2   | 0.18                          | 1 (V.h.n.)      | 1.25    | 2 (L)    | 0.19        | 1 (V.h.n.)      | 1.37    | 2 (L)    | 0.59        | 1 (V.h.n.)      | 0.69    | 1 (A)    |                            |                 |         |          |             |                 |         |          |             |                 |         |          |
| F3   | 0.26                          | 2 (H.n.)        | 1.89    | 2 (L)    | 0.44        | 3 (M.n.)        | 3.22    | 3 (M)    | 0.57        | 1 (V.h.n.)      | 0.67    | 1 (A)    |                            |                 |         |          |             |                 |         |          |             |                 |         |          |
| F4   | 0.19                          | 1 (V.h.n.)      | 1.33    | 2 (L)    | 0.24        | 2 (H.n.)        | 1.77    | 2 (L)    | 0.53        | 1 (V.h.n.)      | 0.62    | 1 (A)    |                            |                 |         |          |             |                 |         |          |             |                 |         |          |
| F5   | 0.26                          | 2 (H.n.)        | 1.86    | 2 (L)    | 0.67        | 3 (M.n.)        | 4.95    | 5 (S)    | 1.00        | 1 (V.h.n.)      | 1.18    | 2 (L)    |                            |                 |         |          |             |                 |         |          |             |                 |         |          |
| F6   |                               |                 |         |          |             |                 |         |          |             |                 |         |          | 0.31                       | 2 (H.n.)        | 2.96    | 3 (M)    | 0.10        | 1 (V.h.n.)      | 1.77    | 2 (L)    | 3.10        | 3 (M.n.)        | 2.59    | 3 (M)    |
| G1   | 0.23                          | 2 (H.n.)        | 1.65    | 2 (L)    | 0.16        | 1 (V.h.n.)      | 1.14    | 2 (L)    | 1.20        | 2 (H.n.)        | 1.42    | 2 (L)    | 0.20                       | 2 (H.n.)        | 1.91    | 2 (L)    | 0.06        | 1 (V.h.n.)      | 1.16    | 2 (L)    | 2.50        | 3 (M.n.)        | 2.09    | 2 (L)    |
| G2   | 0.21                          | 2 (H.n.)        | 1.51    | 2 (L)    | 0.24        | 2 (H.n.)        | 1.75    | 2 (L)    | 0.68        | 1 (V.h.n.)      | 0.80    | 1 (A)    |                            |                 |         |          |             |                 |         |          |             |                 |         |          |
| G3   | 0.20                          | 1 (V.h.n.)      | 1.41    | 2 (L)    | 0.27        | 2 (H.n.)        | 1.99    | 2 (L)    | 0.45        | 1 (V.h.n.)      | 0.53    | 1 (A)    |                            |                 |         |          |             |                 |         |          |             |                 |         |          |
| G4   | 0.31                          | 2 (H.n.)        | 2.22    | 3 (M)    | 0.29        | 2 (H.n.)        | 2.10    | 3 (M)    | 1.02        | 1 (V.h.n.)      | 1.21    | 2 (L)    |                            |                 |         |          |             |                 |         |          |             |                 |         |          |
| G5   | 0.23                          | 2 (H.n.)        | 1.62    | 2 (L)    | 0.21        | 2 (H.n.)        | 1.53    | 2 (L)    | 0.97        | 1 (V.h.n.)      | 1.15    | 2 (L)    |                            |                 |         |          |             |                 |         |          |             |                 |         |          |
| G6   | 0.48                          | 2 (H.n.)        | 3.44    | 4 (H)    | 0.33        | 2 (H.n.)        | 2.40    | 3 (M)    | 4.10        | 4 (L.n.)        | 4.85    | 4 (H)    |                            |                 |         |          |             |                 |         |          |             |                 |         |          |

**Table S6.** Results of the comparative application of the accumulation/loss scale by Frati et al. [25] (Acc./loss classes) and the bioaccumulation scale in Table 5 (B. class) to a real case study. Data refer to three elements (As, Cd, Cr) measured in samples of *Pseudevernia furfuracea* collected in 30 transplant sites (Figure 4). Abbreviations for naturality/alteration and bioaccumulation classes are reported in Table S4 and Table 5. The attribution of classes is based on the *EU* ratio (former *EC* ratio) for both scales.

| Site | As                       |                    |                    |             | Cd                       |                    |                    |             | Cr                       |                    |                    |             |
|------|--------------------------|--------------------|--------------------|-------------|--------------------------|--------------------|--------------------|-------------|--------------------------|--------------------|--------------------|-------------|
|      | Element<br>concentration | <i>EU</i><br>ratio | Acc./loss<br>class | B.<br>class | Element<br>concentration | <i>EU</i><br>ratio | Acc./loss<br>class | B.<br>class | Element<br>concentration | <i>EU</i><br>ratio | Acc./loss<br>class | B.<br>class |
| A1   | 0.26                     | 1.06               | N.                 | 2 (L)       | 0.23                     | 1.21               | N.                 | 2 (L)       | 1.74                     | 1.35               | Acc.               | 2 (L)       |
| A2   | 0.26                     | 1.02               | N.                 | 2 (L)       | 0.46                     | 2.44               | S.a.               | 3 (M)       | 1.59                     | 1.23               | N.                 | 2 (L)       |
| A3   | 0.32                     | 1.26               | Acc.               | 2 (L)       | 0.23                     | 1.22               | N.                 | 2 (L)       | 2.35                     | 1.82               | S.a.               | 3 (M)       |
| A4   | 0.25                     | 0.98               | N.                 | 2 (L)       | 0.21                     | 1.10               | N.                 | 2 (L)       | 1.53                     | 1.19               | N.                 | 2 (L)       |
| A5   | 0.37                     | 1.47               | Acc.               | 2 (L)       | 0.46                     | 2.44               | S.a.               | 3 (M)       | 2.38                     | 1.84               | S.a.               | 3 (M)       |
| A6   | 0.27                     | 1.10               | N.                 | 2 (L)       | 0.25                     | 1.34               | Acc.               | 2 (L)       | 1.85                     | 1.44               | Acc.               | 2 (L)       |
| B1   | 0.31                     | 1.24               | N.                 | 2 (L)       | 0.25                     | 1.30               | Acc.               | 2 (L)       | 1.46                     | 1.13               | N.                 | 2 (L)       |
| B2   | 2.34                     | 9.35               | S.a.               | 5 (S)       | 0.17                     | 0.90               | N.                 | 1 (A)       | 1.46                     | 1.14               | N.                 | 2 (L)       |
| B3   | 0.28                     | 1.12               | N.                 | 2 (L)       | 0.22                     | 1.14               | N.                 | 2 (L)       | 1.85                     | 1.43               | Acc.               | 2 (L)       |
| B4   | 0.32                     | 1.28               | Acc.               | 2 (L)       | 0.26                     | 1.35               | Acc.               | 2 (L)       | 1.35                     | 1.05               | N.                 | 2 (L)       |
| B5   | 0.29                     | 1.16               | N.                 | 2 (L)       | 0.30                     | 1.60               | Acc.               | 2 (L)       | 2.02                     | 1.57               | Acc.               | 2 (L)       |
| B6   | 0.27                     | 1.07               | N.                 | 2 (L)       | 0.23                     | 1.21               | N.                 | 2 (L)       | 1.40                     | 1.09               | N.                 | 2 (L)       |
| B7   | 0.33                     | 1.31               | Acc.               | 2 (L)       | 0.28                     | 1.48               | Acc.               | 2 (L)       | 1.63                     | 1.26               | Acc.               | 2 (L)       |
| B8   | 0.33                     | 1.31               | Acc.               | 2 (L)       | 0.24                     | 1.29               | Acc.               | 2 (L)       | 2.09                     | 1.62               | Acc.               | 2 (L)       |
| C1   | 0.37                     | 1.48               | Acc.               | 2 (L)       | 0.28                     | 1.49               | Acc.               | 2 (L)       | 2.37                     | 1.83               | S.a.               | 3 (M)       |
| C2   | 0.35                     | 1.38               | Acc.               | 2 (L)       | 0.24                     | 1.29               | Acc.               | 2 (L)       | 2.09                     | 1.62               | Acc.               | 2 (L)       |
| C3   | 0.22                     | 0.88               | N.                 | 1 (A)       | 0.21                     | 1.13               | N.                 | 2 (L)       | 1.16                     | 0.90               | N.                 | 2 (L)       |
| C5   | 0.31                     | 1.26               | Acc.               | 2 (L)       | 0.30                     | 1.60               | Acc.               | 2 (L)       | 1.60                     | 1.24               | N.                 | 2 (L)       |
| C6   | 0.29                     | 1.15               | N.                 | 2 (L)       | 0.20                     | 1.07               | N.                 | 2 (L)       | 1.81                     | 1.41               | Acc.               | 2 (L)       |
| D1   | 0.21                     | 0.84               | N.                 | 1 (A)       | 0.20                     | 1.03               | N.                 | 2 (L)       | 1.65                     | 1.28               | Acc.               | 2 (L)       |
| D2   | 0.22                     | 0.90               | N.                 | 1 (A)       | 0.21                     | 1.10               | N.                 | 2 (L)       | 1.33                     | 1.03               | N.                 | 2 (L)       |
| D3   | 0.29                     | 1.15               | N.                 | 2 (L)       | 0.44                     | 2.31               | S.a.               | 3 (M)       | 2.03                     | 1.57               | Acc.               | 2 (L)       |
| D4   | 0.23                     | 0.93               | N.                 | 2 (L)       | 0.21                     | 1.11               | N.                 | 2 (L)       | 1.19                     | 0.92               | N.                 | 2 (L)       |
| D5   | 0.37                     | 1.50               | Acc.               | 2 (L)       | 0.40                     | 2.09               | S.a.               | 3 (M)       | 2.06                     | 1.60               | Acc.               | 2 (L)       |
| D6   | 0.24                     | 0.97               | N.                 | 2 (L)       | 0.25                     | 1.33               | Acc.               | 2 (L)       | 1.69                     | 1.31               | Acc.               | 2 (L)       |
| E1   | 0.24                     | 0.95               | N.                 | 2 (L)       | 0.27                     | 1.41               | Acc.               | 2 (L)       | 1.75                     | 1.36               | Acc.               | 2 (L)       |
| E2   | 0.25                     | 1.02               | N.                 | 2 (L)       | 0.22                     | 1.15               | N.                 | 2 (L)       | 1.63                     | 1.26               | Acc.               | 2 (L)       |
| E3   | 0.25                     | 1.01               | N.                 | 2 (L)       | 0.27                     | 1.41               | Acc.               | 2 (L)       | 1.54                     | 1.20               | N.                 | 2 (L)       |
| E4   | 0.22                     | 0.90               | N.                 | 1 (A)       | 0.22                     | 1.14               | N.                 | 2 (L)       | 1.76                     | 1.37               | Acc.               | 2 (L)       |
| E5   | 0.22                     | 0.90               | N.                 | 1 (A)       | 0.19                     | 0.99               | N.                 | 2 (L)       | 1.28                     | 0.99               | N.                 | 2 (L)       |

## SUPPLEMENTARY FIGURES

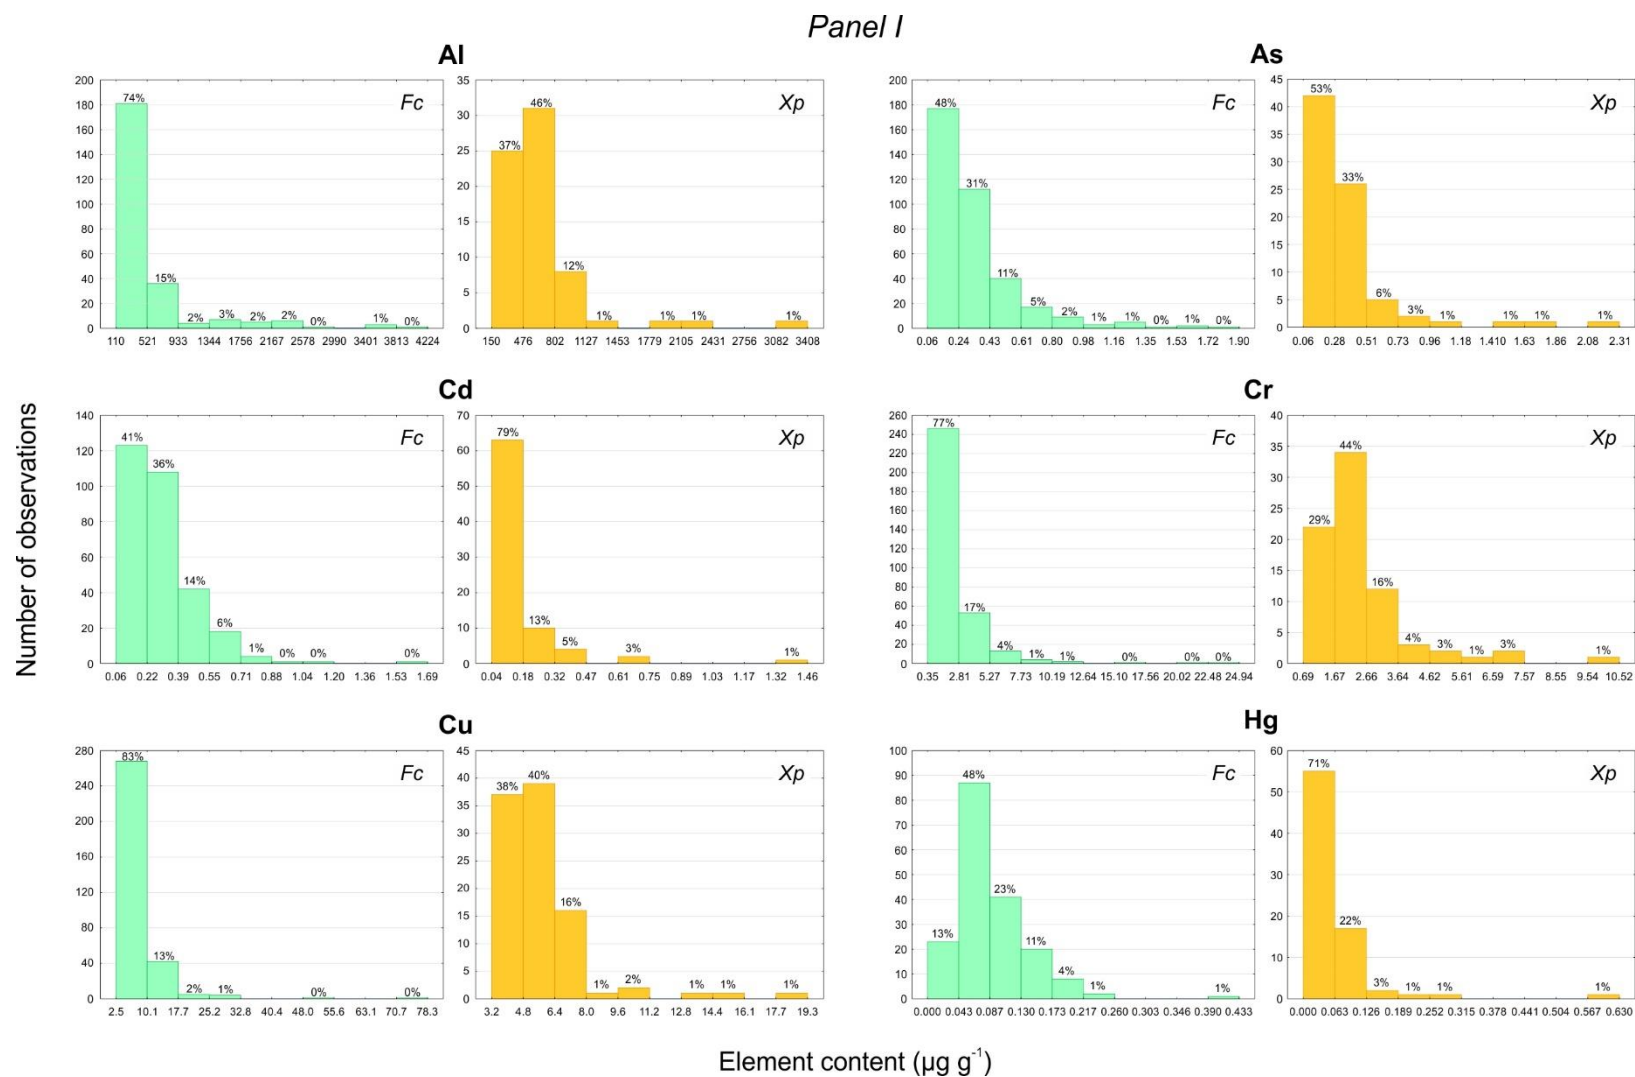

**Figure S1.** Distributions of element concentration data for *Flavoparmelia caperata* (Fc: pale green bars) and *Xanthoria parietina* (Xp: orange bars) in the dataset N (panel I: Al, As, Cd, Cr, Cu, Hg; panel II: Ni, Pb, Ti, V, Zn).



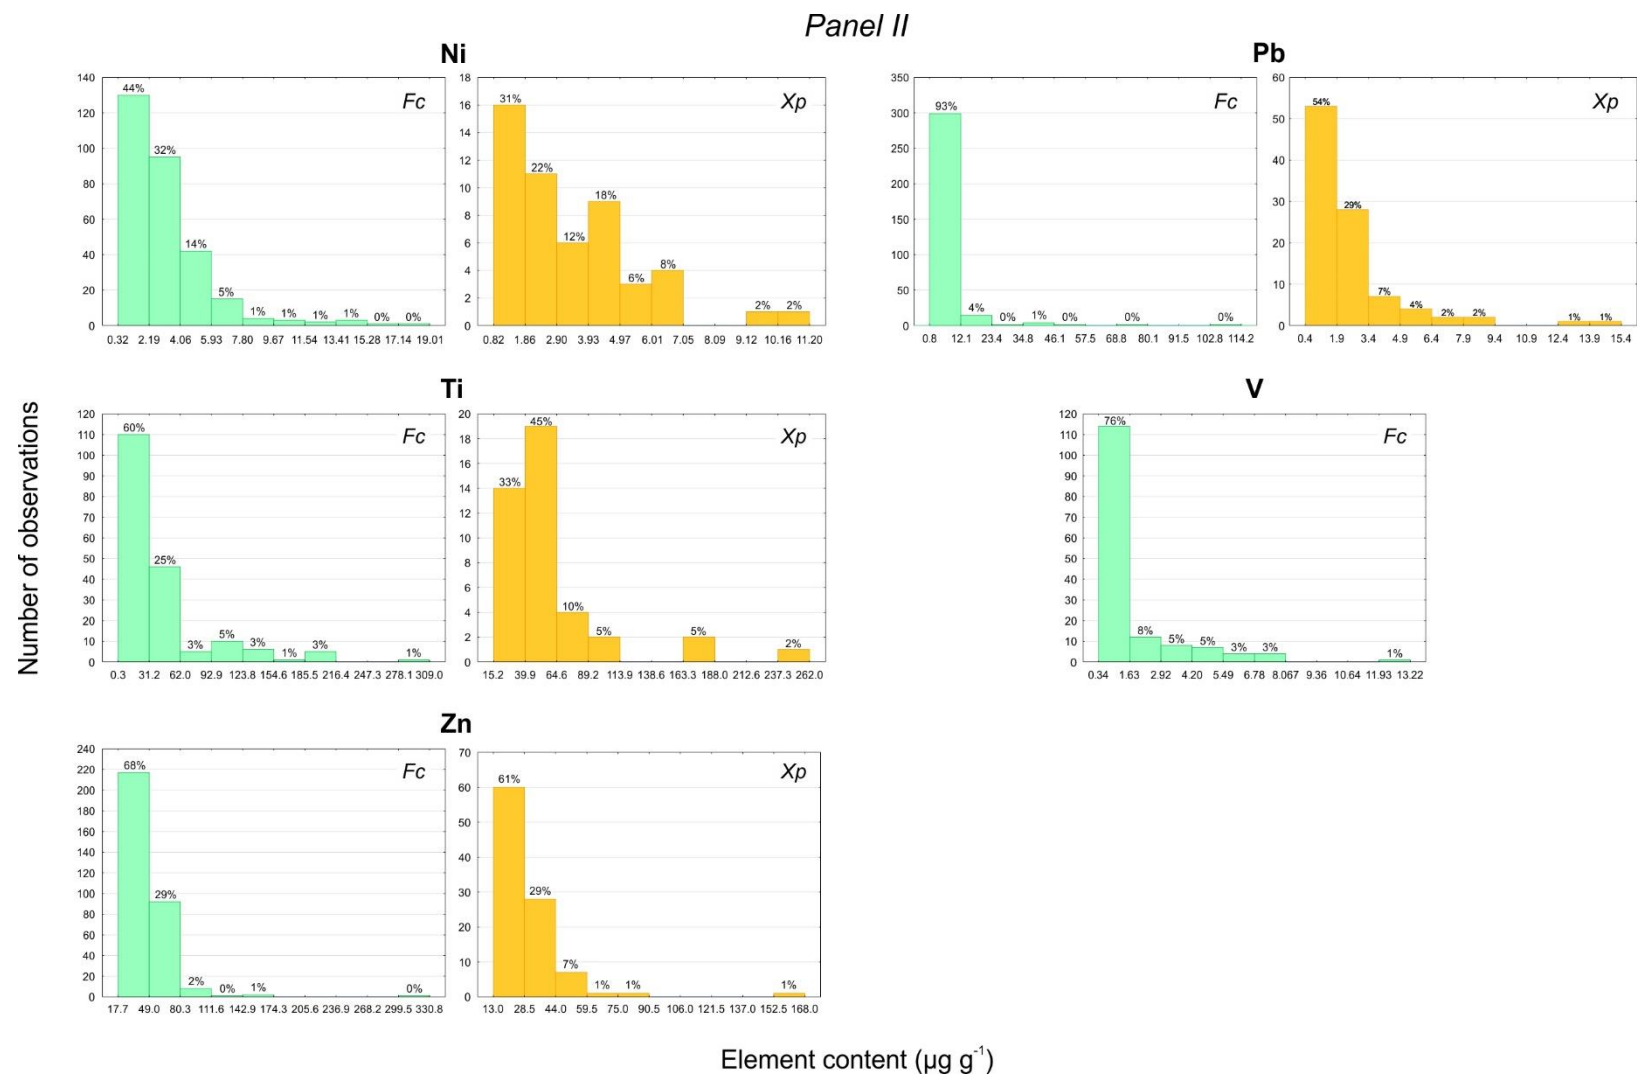

**Figure S1.** Distributions of element concentration data for *Flavoparmelia caperata* (Fc: pale green bars) and *Xanthoria parietina* (Xp: orange bars) in the dataset N (panel I: Al, As, Cd, Cr, Cu, Hg; panel II: Ni, Pb, Ti, V, Zn).

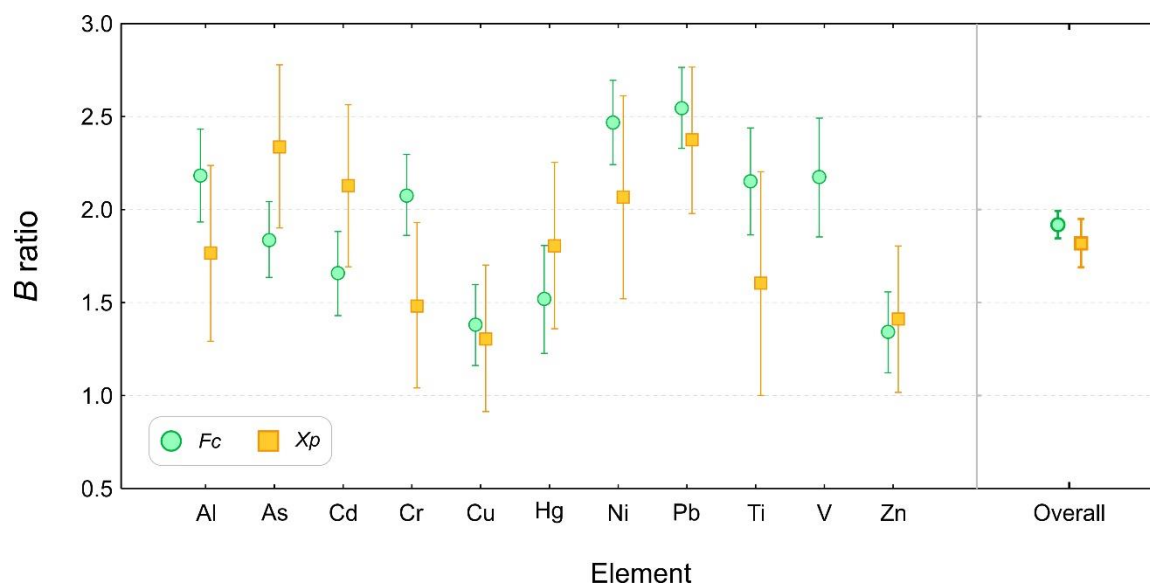

**Figure S2.** *B* ratio data, separately reported for 11 elements or not (overall), in the lichen species *Flavoparmelia caperata* (Fc: pale green) and *Xanthoria parietina* (Xp: orange). Data are shown as means and 95% confidence intervals.

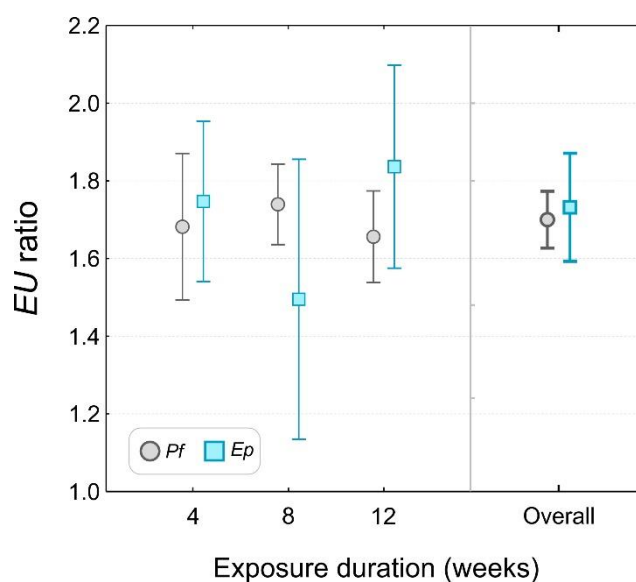

**Figure S3.** *EU* ratio data, separately reported for three exposure time spans (4, 8 and 12 weeks) or not (overall), in the lichen species *Evernia prunastri* (Ep: pale blue) and *Pseudevernia furfuracea* (Pf: grey). Data are shown as means and 95% confidence intervals.
